# Supplementary material
Source: Research Square preprint supplement (doi:10.21203/rs.3.rs-8159327/v1)
Supplement: Supplementary file 1 [file ab755338826cc5f1a6081b13.docx]

| Gene set | Number | Average gene length (bp) | Average CDS length (bp) | Average exon per gene | Average exon length (bp) | Average intron length (bp) |
| --- | --- | --- | --- | --- | --- | --- |
| denovo/AUGUSTUS | 22964 | 13354.38 | 1706.92 | 9.52 | 179.38 | 1367.75 |
| denovo/Genscan | 28660 | 15269.22 | 1639.18 | 9.3 | 176.31 | 1642.74 |
| homo/S.lalandi | 39588 | 7966.17 | 1156.94 | 6.31 | 183.37 | 1282.55 |
| homo/S.dumerili | 38779 | 8075 | 1153.94 | 6.37 | 181.2 | 1289.26 |
| homo/E.naucrates | 38726 | 8386.31 | 1191.8 | 6.43 | 185.41 | 1325.46 |
| homo/L.crocea | 40372 | 8062.28 | 1156.11 | 6.25 | 185.02 | 1315.79 |
| homo/E.lanceolatus | 40317 | 8103.06 | 1143.49 | 6.23 | 183.52 | 1330.48 |
| trans.orf/RNAseq | 14903 | 14665.4 | 1756.37 | 11.35 | 308.7 | 1078.4 |
| MAKER | 22555 | 14184.21 | 1754.63 | 10.46 | 265.88 | 1204.63 |
| PASA | 22413 | 14771.33 | 1763.37 | 10.53 | 281.49 | 1221.57 |

| **Gene set** | **Number** | **Average gene length (bp)** | **Average CDS length (bp)** | **Average exon per gene** | **Average exon length (bp)** | **Average intron length (bp)** |
| --- | --- | --- | --- | --- | --- | --- |
| denovo/AUGUSTUS | 22,964 | 13,354.38 | 1,706.92 | 9.52 | 179.38 | 1,367.75 |
| denovo/Genscan | 28,660 | 15,269.22 | 1,639.18 | 9.30 | 176.31 | 1,642.74 |
| homo/*S.lalandi* | 39,588 | 7,966.17 | 1,156.94 | 6.31 | 183.37 | 1,282.55 |
| homo/*S.dumerili* | 38,779 | 8,075.00 | 1,153.94 | 6.37 | 181.20 | 1,289.26 |
| homo/*E.naucrates* | 38,726 | 8,386.31 | 1,191.80 | 6.43 | 185.41 | 1,325.46 |
| homo/*L.crocea* | 40,372 | 8,062.28 | 1,156.11 | 6.25 | 185.02 | 1,315.79 |
| homo/*E.lanceolatus* | 40,317 | 8,103.06 | 1,143.49 | 6.23 | 183.52 | 1,330.48 |
| trans.orf/RNAseq | 14,903 | 14,665.40 | 1,756.37 | 11.35 | 308.70 | 1,078.40 |
| MAKER | 22,555 | 14,184.21 | 1,754.63 | 10.46 | 265.88 | 1,204.63 |
| PASA | 22,413 | 14,771.33 | 1,763.37 | 10.53 | 281.49 | 1,221.57 |

**Supplementary Table 1.** Summary statistics of gene prediction in the assembled genome of *G. speciosus*.
